# Supplementary material for: Decline of FoxP3+ Regulatory CD4 T Cells in Peripheral Blood of Children Heavily Exposed to Malaria
Source: PubMed Central journal article supplement (PMC4504515; doi:10.1371/journal.ppat.1005041), 2015-07-16
Supplement: ppat.1005041.s001.pdf [file ppat.1005041.s001.pdf]

**S1 Table: Cohort characteristics**

| Name of study cohort                                              | PROMOTE       |                | TCC              | PRISM            |                |
|-------------------------------------------------------------------|---------------|----------------|------------------|------------------|----------------|
|                                                                   | control       | SP             |                  | Nagongera Tororo | Walukuba Jinja |
| Transmission (aEIR, bites ppy) <sup>#</sup>                       | High (310)    | High (310)     | High (310)       | High (310)       | Low (2.8)      |
| Chemoprevention                                                   | X             | Monthly SP     | X                | X                | X              |
| Number of children enrolled                                       | 82            | 41             | 75               | 91               | 34             |
| Age years (median, IQR)                                           | 2 (2-2)       | 2 (2-2)        | 4.3 (4.0-4.3)    | 6.3 (4.3-8.2)    | 5.8 (3.6-7.1)  |
| Symptomatic malaria at time of blood draw, n (%)                  | 3 (3.7%)      | 3 (7.3%)       | 1 (1.3%)         | 2 (2.2%)         | 0              |
| Asymptomatic infection (blood smear) at time of blood draw, n (%) | 3 (3.7%)      | 8 (19.5%)      | 19 (25.3%)       | 20 (22%)         | 0              |
| Clinical characteristics prior to blood draw                      |               |                |                  |                  |                |
| Observation time (median years, IQR)                              | 1.5 (1.5-1.5) | 1.5 (1.5-1.5)  | 3.7 (3.6-3.9)    | 2.5 (2.5-2.5)    | 2.0 (2.0-2.0)  |
| Number of children with any episodes of malaria                   | 79 (96.3%)    | 41 (100%)      | 73 (97.3%)       | 91 (100%)        | 15 (44.1%)     |
| Overall malaria incidence (median, IQR)                           | 5.3 (2.7-7.3) | 6.7 (3.0-12.1) | 5.7 (3.7-7.1)    | 3.6 (2.0-4.8)    | 0 (0-0.5)      |
| Days since last episode of malaria (median IQR) <sup>^</sup>      | 27 (11-70)    | 29.5 (19-61.5) | 35 (20-70)       | 62 (37-187)      | 230 (201-606)  |
| Clinical characteristics following blood draw                     |               |                |                  |                  |                |
| Observation time (median years, IQR)                              | 1 (1-1)       | 1 (1-1)        | 0.77 (0.72-0.95) | 0.96 (0.94-0.97) | 1 (1-1)        |
| Number of children with any episodes of malaria                   | 78 (95.1%)    | 40 (97.6%)     | 67 (89.3%)       | 83 (91.2%)       | 1 (2.9%)       |
| Overall malaria incidence (ppy, IQR)                              | 7 (4-11)      | 10 (4-13)      | 5.4 (2.6-7.0)    | 3.2 (1.1-5.2)    | 0 (0-0)        |
| Days until next episode of malaria (median IQR) <sup>^</sup>      | 33 (15-86)    | 24.5 (10-44)   | 51 (22-92)       | 56 (30-83)       | 234 (NA)       |

<sup>#</sup> Annual entomological inoculation rate from [25]

<sup>\*</sup> Samples from PROMOTE-Chemoprevention study were taken at 16, 24, 28 and 36 months of age, as indicated in result sections, clinical characteristics here are for 24 months of age

<sup>^</sup> Days since and to next malara episode is for children with a least one episode only
