# Supplementary material for: Decline of FoxP3+ Regulatory CD4 T Cells in Peripheral Blood of Children Heavily Exposed to Malaria
Source: PubMed Central journal article supplement (PMC4504515; doi:10.1371/journal.ppat.1005041), 2015-07-16
Supplement: ppat.1005041.s004.pdf [file ppat.1005041.s004.pdf]

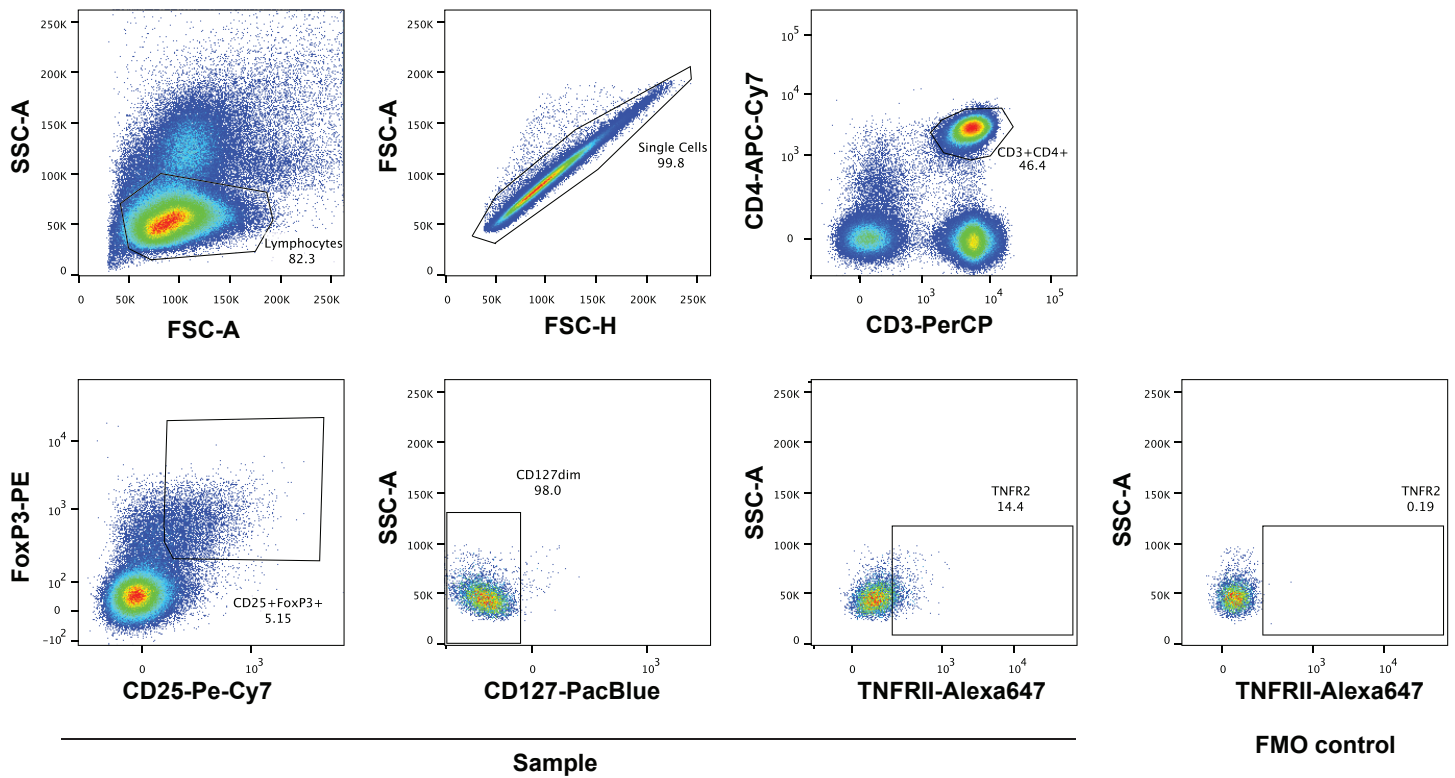

### S3 Figure: Gating strategy for TNFR2 expression

Frequencies of regulatory T cells expression TNFR2 were enumerated by staining PBMCs. Gating for FoxP3+CD25+CD127dim regulatory T cells was as for S1 Figure. TNFR2 staining was gated on FMO controls, as indicated.
