# Supplementary material for: Decline of FoxP3+ Regulatory CD4 T Cells in Peripheral Blood of Children Heavily Exposed to Malaria
Source: PubMed Central journal article supplement (PMC4504515; doi:10.1371/journal.ppat.1005041), 2015-07-16
Supplement: ppat.1005041.s005.pdf [file ppat.1005041.s005.pdf]

**A**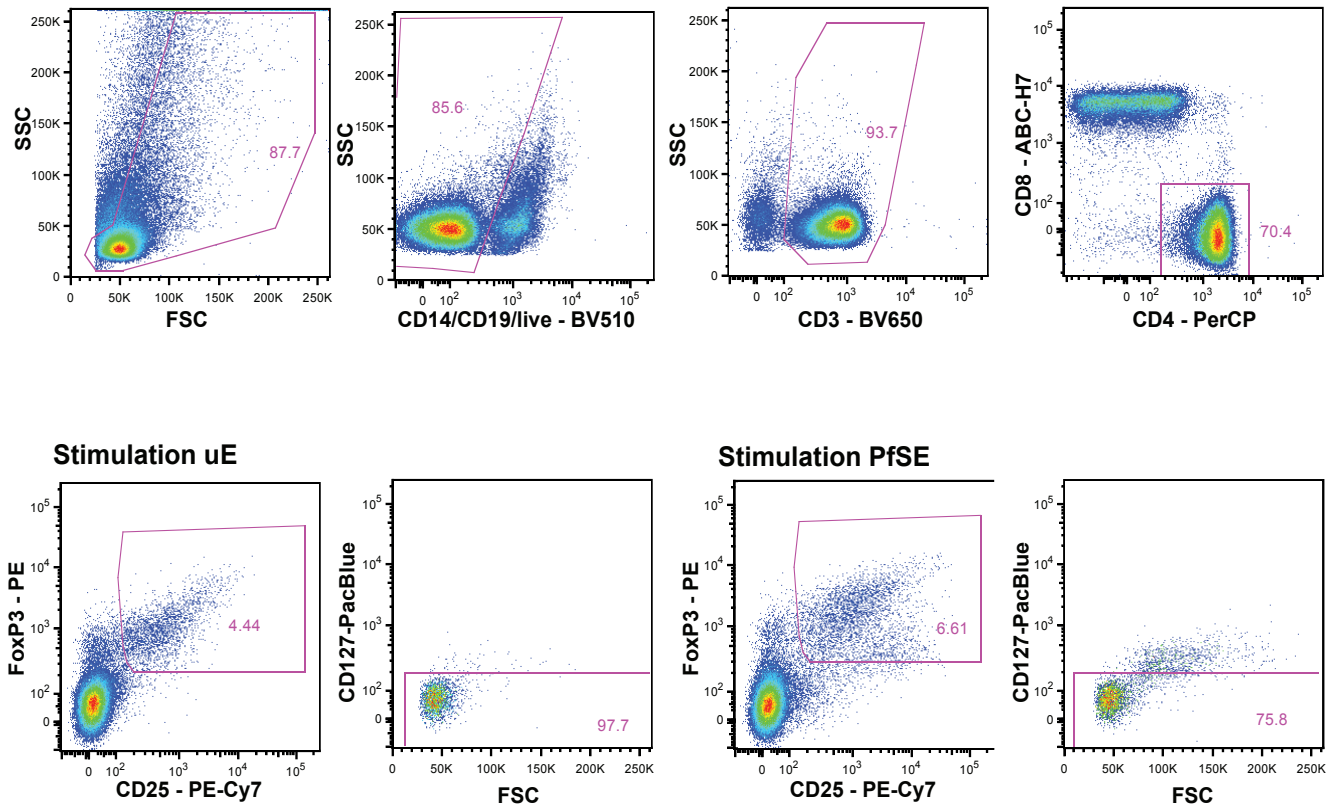**B**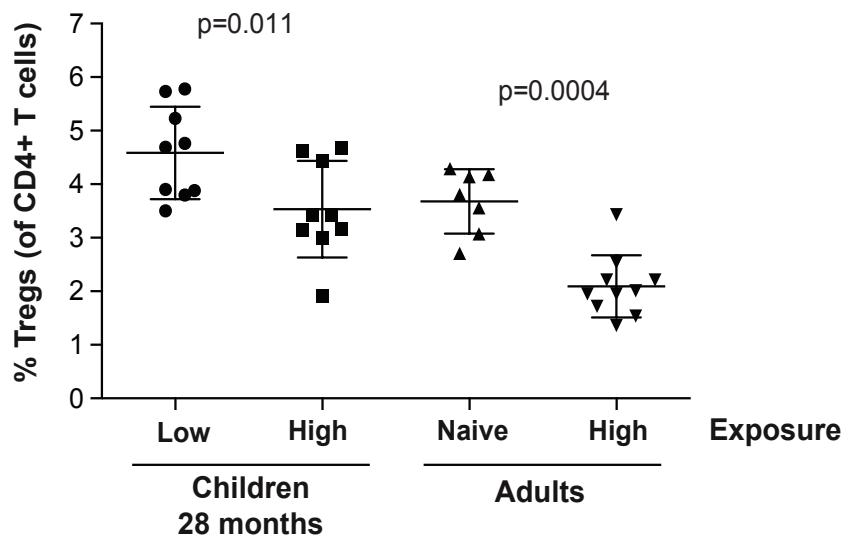**C**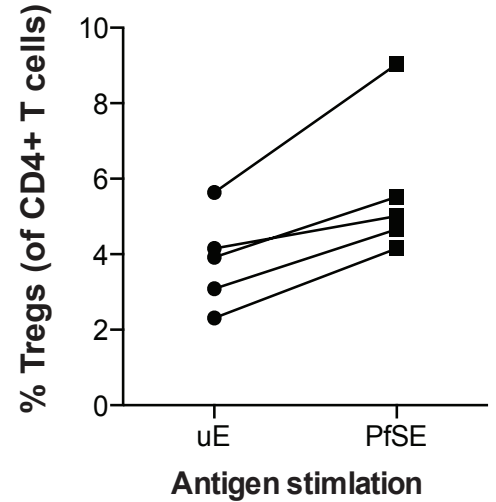**S4 Figure: Regulatory T cell induction assays**

**A.** PBMCs were incubated with *P. falciparum* schizont extract (PfSE), or uninfected RBC extract (uE) for 7 days, then the frequency of FoxP3+CD25+CD127<sup>low</sup> cells among CD4+ T cells was measured. **B.** *Ex vivo* frequencies of FoxP3+CD25+CD127<sup>low</sup> regulatory T cells in samples used for stimulation assays. **C.** In PBMCs from malaria-naïve adults, incubation with PfSE resulted in increased frequencies of T<sub>regs</sub> compared to PBMCs cultured with uE. See also Figure 5a and 5b.
