# Supplementary material for: Decline of FoxP3+ Regulatory CD4 T Cells in Peripheral Blood of Children Heavily Exposed to Malaria
Source: PubMed Central journal article supplement (PMC4504515; doi:10.1371/journal.ppat.1005041), 2015-07-16

**A**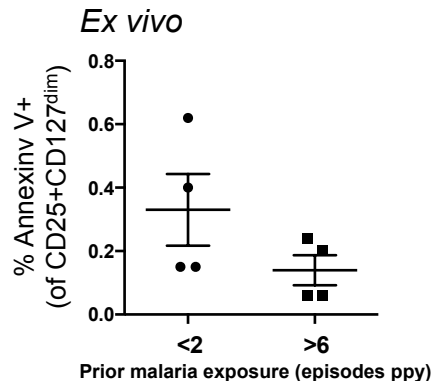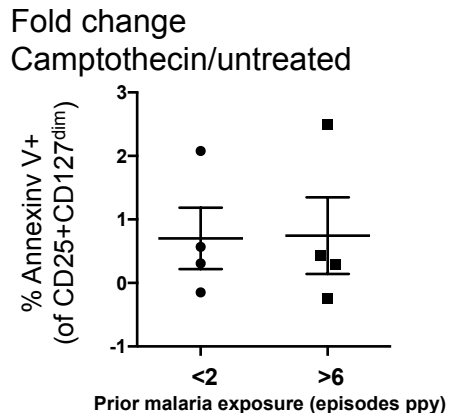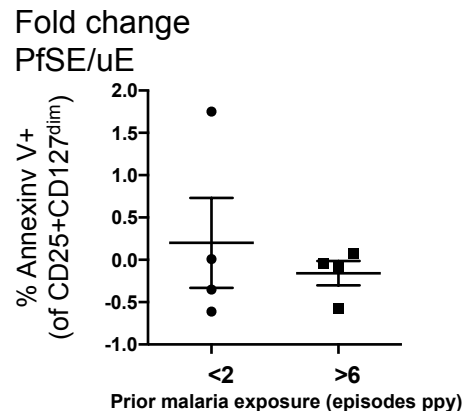**B**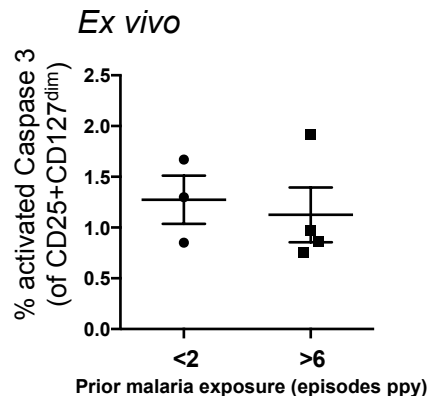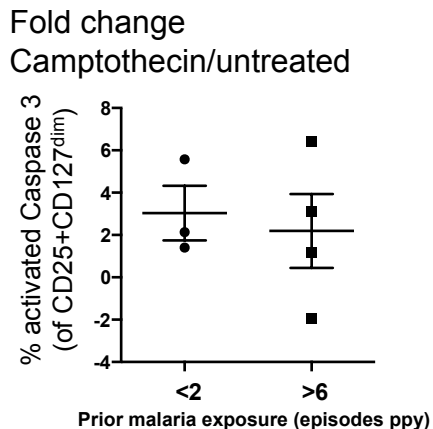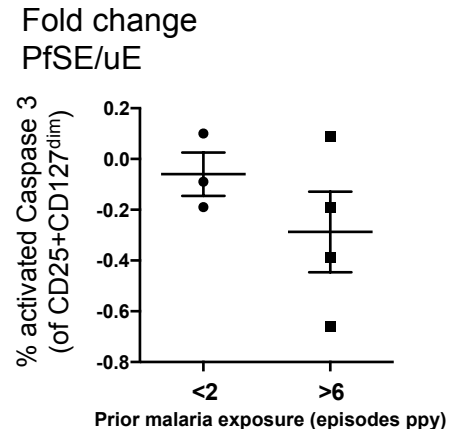

Supplement: ppat.1005041.s006.pdf [file ppat.1005041.s006.pdf]
